# Supplementary material
Source: PubMed Central journal article supplement (PMC8756484)
Supplement: sj-pdf-1-jcb-10.1177_0271678X211023387.pdf [file sj-pdf-1-jcb-10.1177_0271678X211023387.pdf]

# Supplemental Material

for “[<sup>11</sup>C]PBR28 radiotracer kinetics are not driven by alterations in cerebral blood flow”

by Christin Y Sander et al. in the Journal of Cerebral Blood Flow and Metabolism

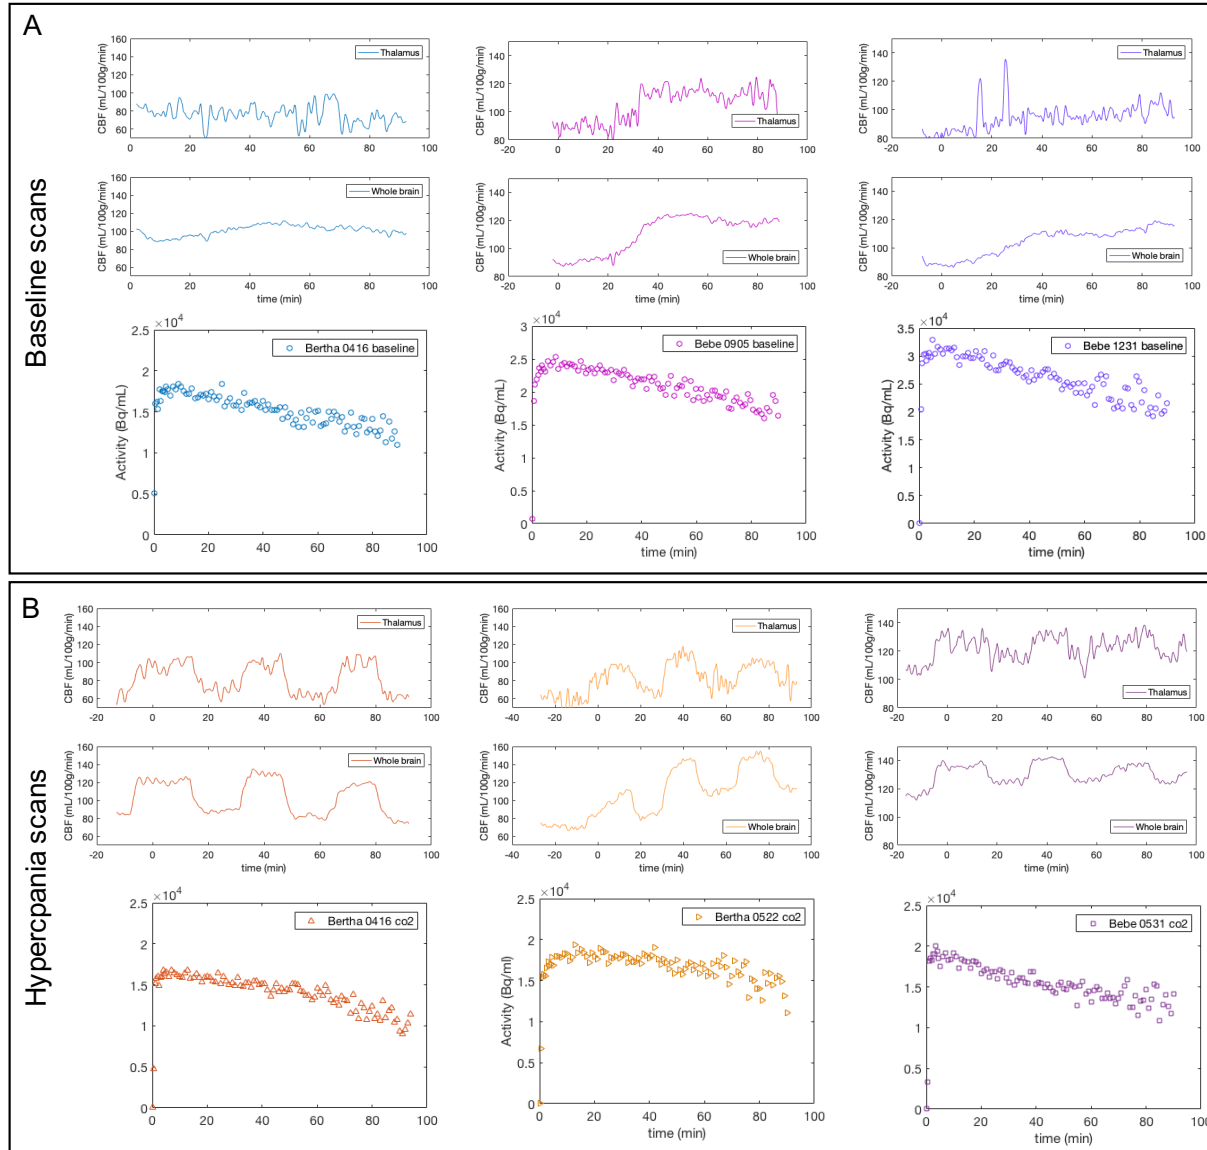

**Figure S1:** Timecourses of cerebral blood flow measurements (CBF) in thalamus and whole brain together with simultaneously acquired [<sup>11</sup>C]PBR28 time activity curves in thalamus for baseline (A) and hypercapnia scans (B) shown for each of the three sessions in two animals. During the hypercapnia scans (B), intervals of alternating induced high vs. low CBF are clearly visible without any changes in the corresponding time activity curves.

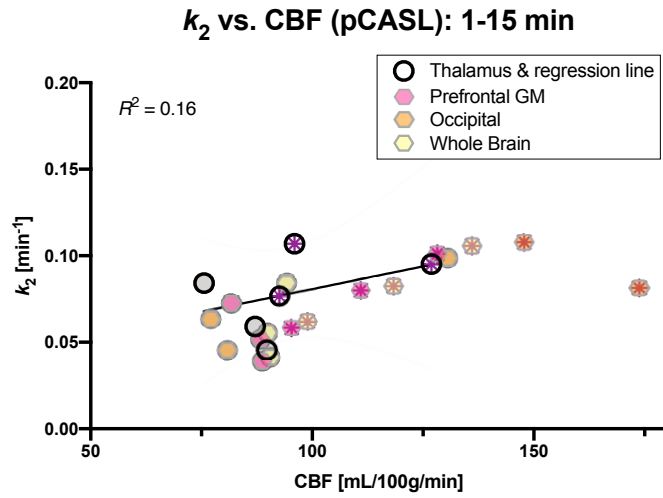

**Figure S2:** Comparison between the tissue-to-plasma rate constant  $k_2$  and cerebral blood flow from the first 15 min of [ $^{11}\text{C}$ ]PBR28 acquisition in the non-human primates. Datapoints with a star denote hypercapnia sessions. A linear regression between the tissue-to-plasma rate constant  $k_2$  and cerebral blood flow (CBF) did not show evident correlations (regression line displayed for the thalamus).

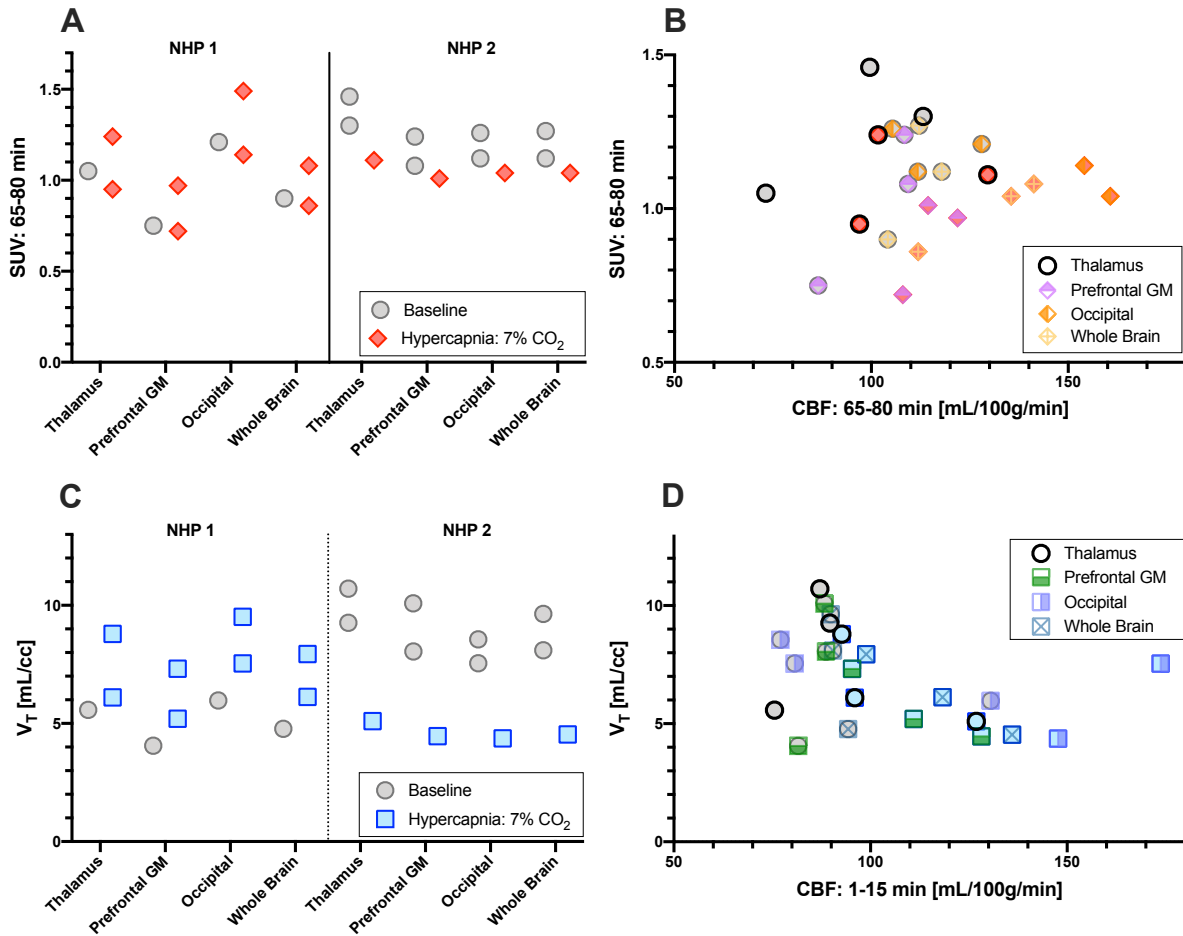

**Figure S3:** (A) Absolute standard uptake values (SUV) for the 65-80 min scan interval show small variations but no consistent pattern between baseline and hypercapnia conditions. (B) Linear regressions between SUV and cerebral blood flow (CBF) from the 65-80 min scan interval do not show evident correlation in any of the regions. (C) The volume of distribution outcome measure also shows variations between sessions, but no systematic differences for baseline vs. hypercapnia conditions. (D) The volume of distribution shows a small negative correlation to CBF from the first 1-15 min scan interval in all regions, which is of opposite sign compared to an expected increase in CBF. This may be driven by the variability in volume of distribution values; a larger sample size is needed for statistical inference.
